# Supplementary material
Source: ML conference proceedings conference paper supplement (https://openaccess.thecvf.com/content/ICCV_2019/html/Oh_Onion-Peel_Networks_for_ICCV_2019_paper.html)
Supplement: Supplementary file 1 [file 2840-supp.pdf › 2840-supp.pdf]

# Supplementary Material: Onion-Peel Networks for Deep Video Completion

Seoung Wug Oh  
Yonsei University

Sungho Lee  
Yonsei University

Joon-Young Lee  
Adobe Research

Seon Joo Kim  
Yonsei University

## 1. Temporal Consistency Networks

For the video completion, we post-process frame-by-frame results with the temporal consistency network (TCN) [5]. We modified the original work [5] to match our purpose: stabilizing the inpainted videos. Here, we provide more detailed descriptions of the post-processing networks.

**Network Design** The network structure of TCN is shown in Fig. 1. The networks consists of the encoder, the convolutional GRU [2], and the decoder. The encoder inputs are the previous stabilized frame ( $P_{t-1}$ ), the current frame to be stabilized ( $I_t$ ), and their object masks. The output is the stabilized current frame ( $P_t$ ). The convolutional GRU [2] is employed to capture a long-term temporal consistency. Skip-connections links the encoder and the decoder features. All the convolutional layer is the gated convolutional layer [10].

**Loss Function.** The networks is trained to balance between the temporal stability with the previous frame and the perceptual similarity with the current frame.

The temporal stability loss is defined as a pixel distance toward warped previous output:

$$\mathcal{L}_{ts} = \|M \odot (P_t - \hat{P}_{t-1})\|_1, \quad (1)$$

where  $\hat{P}_{t-1}$  is the previous output  $P_{t-1}$  warped by the optical flow  $F_{t-1 \Rightarrow t}$  and  $M$  is a visibility map. The optical flow is computed from the ground truth frames  $Y_t, Y_{t-1}$  (training frames without holes). We used PWC-Net for computing the optical flow [8]. The visibility map  $M$  is defined as  $M = \exp(-100\|Y_t - \hat{Y}_{t-1}\|_2^2)$ .

The perceptual similarity loss is defined as follows:

$$\mathcal{L}_{ps} = \|\phi_5(I_t) - \phi_5(P_t)\|_1, \quad (2)$$

where  $\phi_s(\cdot)$  is the mapping to  $s$ -th pooled feature map of VGG-16 network [7] pre-trained on ImageNet.

The total loss is the weighted summation of two:

$$\mathcal{L}_{total} = 15 \cdot \mathcal{L}_{ts} + \mathcal{L}_{ps}. \quad (3)$$

**Training Data.** As the network targets for stabilizing inpainted video frames produced by our onion-peel network,

we directly uses output of the onion-peel network as input to the temporal consistency network. We use the same training images for the onion-peel network training.

## 2. Image Completion Result

In addition to Fig. 6 of the main paper, we provide more results for the image completion guided by reference images. In Fig. 2 - 5, we compare our method against Yu *et al.* [11] and Photoshop’s content aware fill [1].

## 3. Video Completion Results

We provide our object removal results on the DAVIS videos [6] with shadow annotations provided by [3]. We compare our method against two state-of-the-art methods: VINet [4] and Huang *et al.* [3]. In the video file, `Video_completion.mp4`, we provide side-by-side comparisons on challenging test videos.

## References

- [1] Connelly Barnes, Eli Shechtman, Adam Finkelstein, and Dan B Goldman. Patchmatch: a randomized correspondence algorithm for structural image editing. *ACM Transactions on Graphics (TOG)*, 28(3):24, 2009. 1
- [2] Kyunghyun Cho, Bart Van Merriënboer, Caglar Gulcehre, Dzmitry Bahdanau, Fethi Bougares, Holger Schwenk, and Yoshua Bengio. Learning phrase representations using rnn encoder-decoder for statistical machine translation. *arXiv preprint arXiv:1406.1078*, 2014. 1
- [3] Jia-Bin Huang, Sing Bing Kang, Narendra Ahuja, and Johannes Kopf. Temporally coherent completion of dynamic video. *ACM Transactions on Graphics (TOG)*, 35(6), 2016. 1
- [4] Dahun Kim, Sanghyun Woo, Joon-Young Lee, and In So Kweon. Deep video inpainting. In *Proceedings of the IEEE Conference on Computer Vision and Pattern Recognition*, 2019. 1
- [5] Wei-Sheng Lai, Jia-Bin Huang, Oliver Wang, Eli Shechtman, Ersin Yumer, and Ming-Hsuan Yang. Learning blind video temporal consistency. In *European Conference on Computer Vision*, 2018. 1

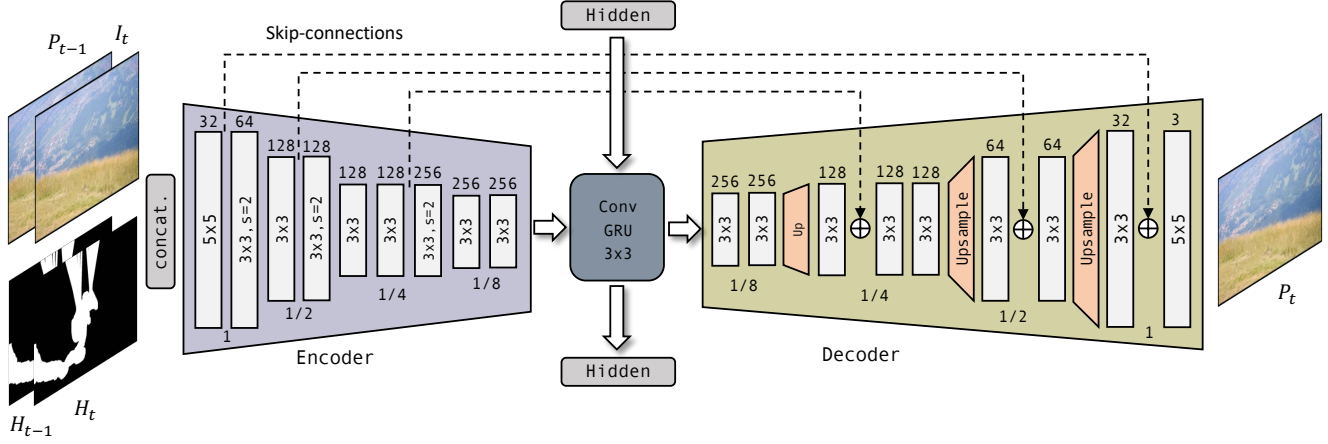

Figure 1: Temporal consistency networks.  $\oplus$  indicates the element-wise addition.

- [6] Federico Perazzi, Jordi Pont-Tuset, Brian McWilliams, Luc Van Gool, Markus Gross, and Alexander Sorkine-Hornung. A benchmark dataset and evaluation methodology for video object segmentation. In *IEEE Conference on Computer Vision and Pattern Recognition (CVPR)*, 2016. 1
- [7] Karen Simonyan and Andrew Zisserman. Very deep convolutional networks for large-scale image recognition. *arXiv preprint arXiv:1409.1556*, 2014. 1
- [8] Deqing Sun, Xiaodong Yang, Ming-Yu Liu, and Jan Kautz. Pwc-net: Cnns for optical flow using pyramid, warping, and cost volume. In *Proceedings of the IEEE Conference on Computer Vision and Pattern Recognition*, pages 8934–8943, 2018. 1
- [9] Ning Xu, Linjie Yang, Dingcheng Yue, Jianchao Yang, Yuchen Fan, Yuchen Liang, and Thomas Huang. Youtubevos: A large-scale video object segmentation benchmark. In *arXiv preprint arXiv:1809.03327*, 2018. 3, 4, 5, 6
- [10] Jiahui Yu, Zhe Lin, Jimei Yang, Xiaohui Shen, Xin Lu, and Thomas S Huang. Free-form image inpainting with gated convolution. *arXiv preprint arXiv:1806.03589*, 2018. 1
- [11] Jiahui Yu, Zhe Lin, Jimei Yang, Xiaohui Shen, Xin Lu, and Thomas S Huang. Generative image inpainting with contextual attention. In *Proceedings of the IEEE Conference on Computer Vision and Pattern Recognition*, pages 5505–5514, 2018. 1

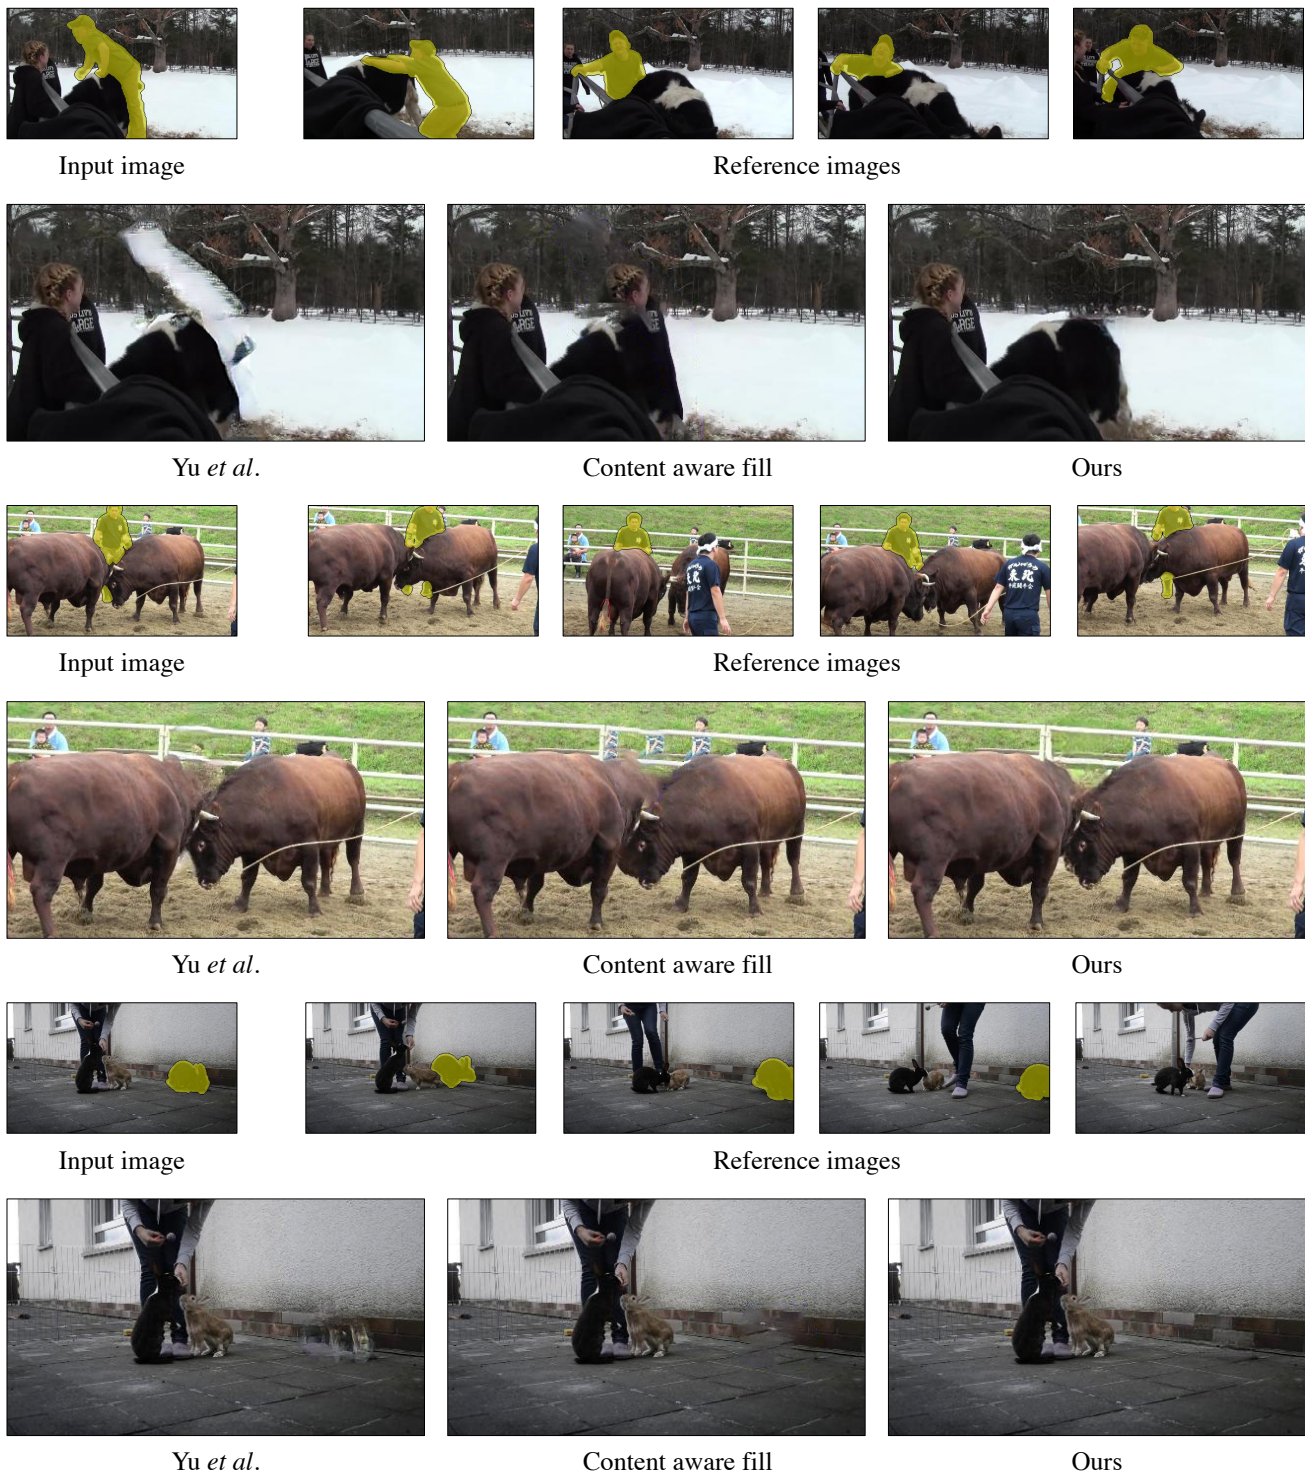

Figure 2: Examples of image completion using a group of photos (Best viewed on a high-resolution display with zoom-in). The images are from Youtube-VOS [9].



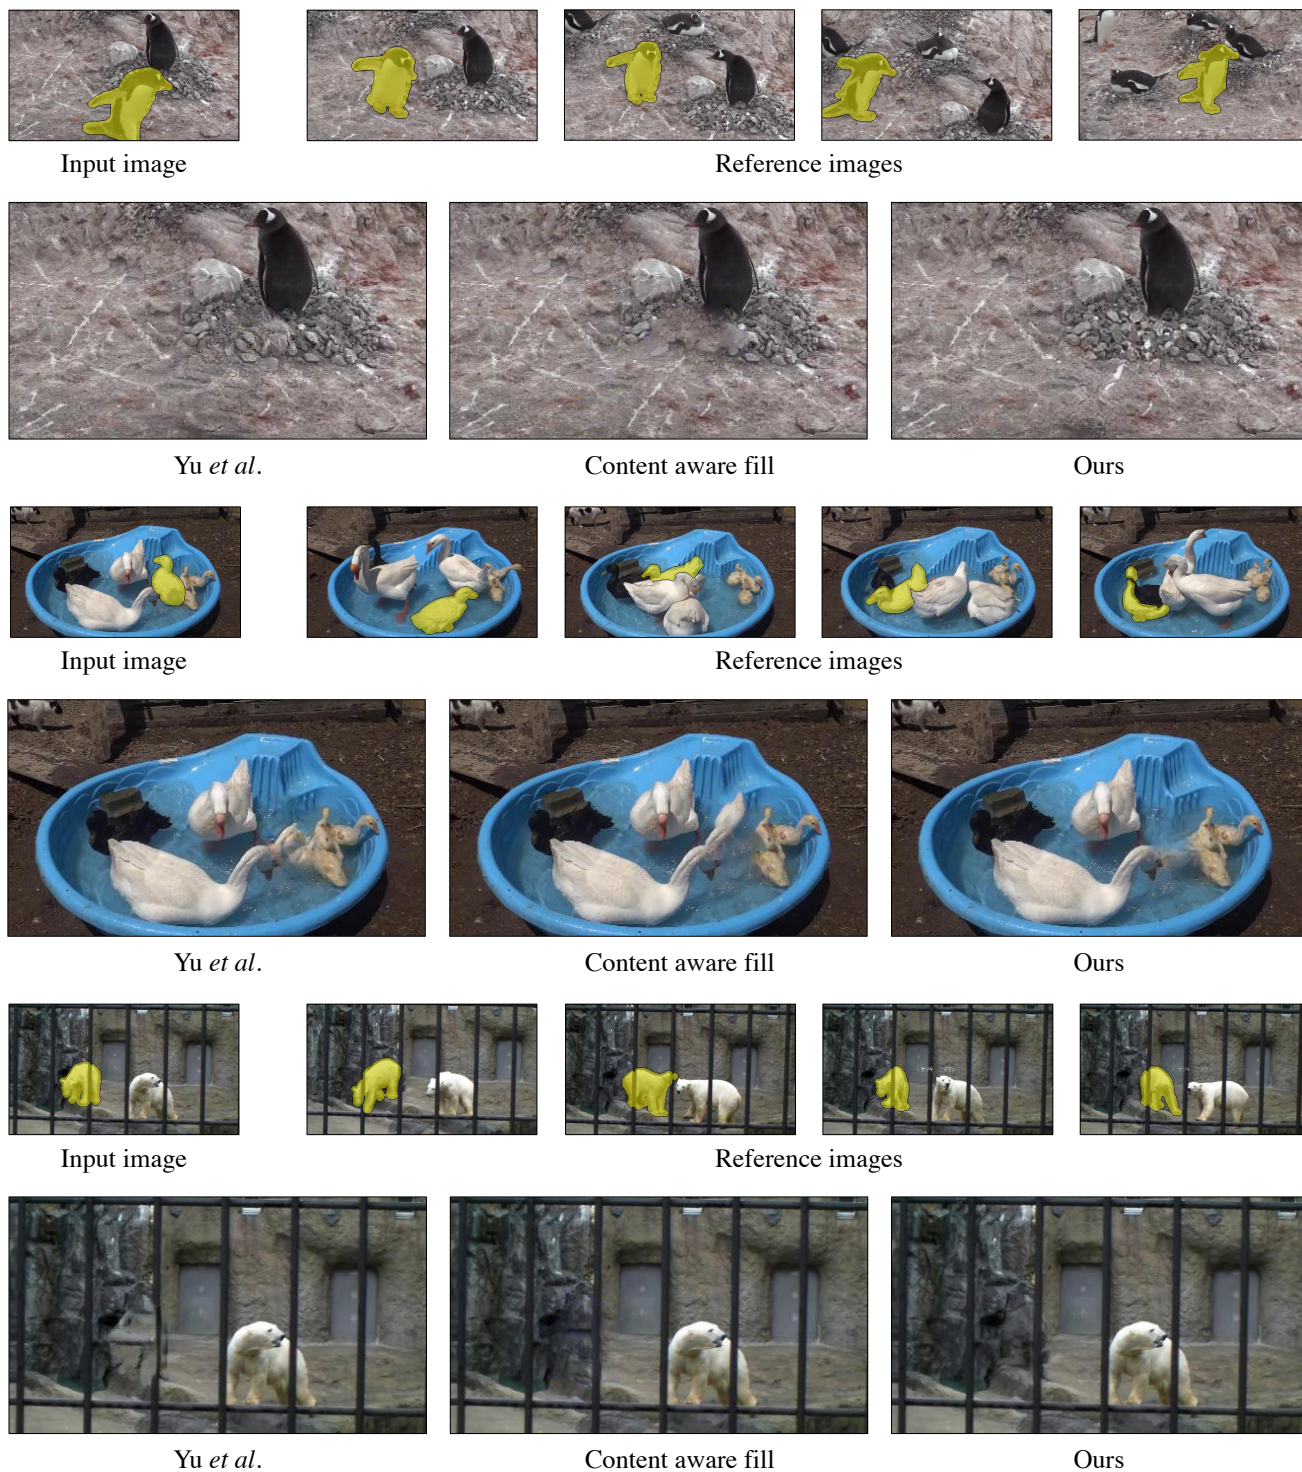

Figure 3: Examples of image completion using a group of photos (Best viewed on a high-resolution display with zoom-in). The images are from Youtube-VOS [9].



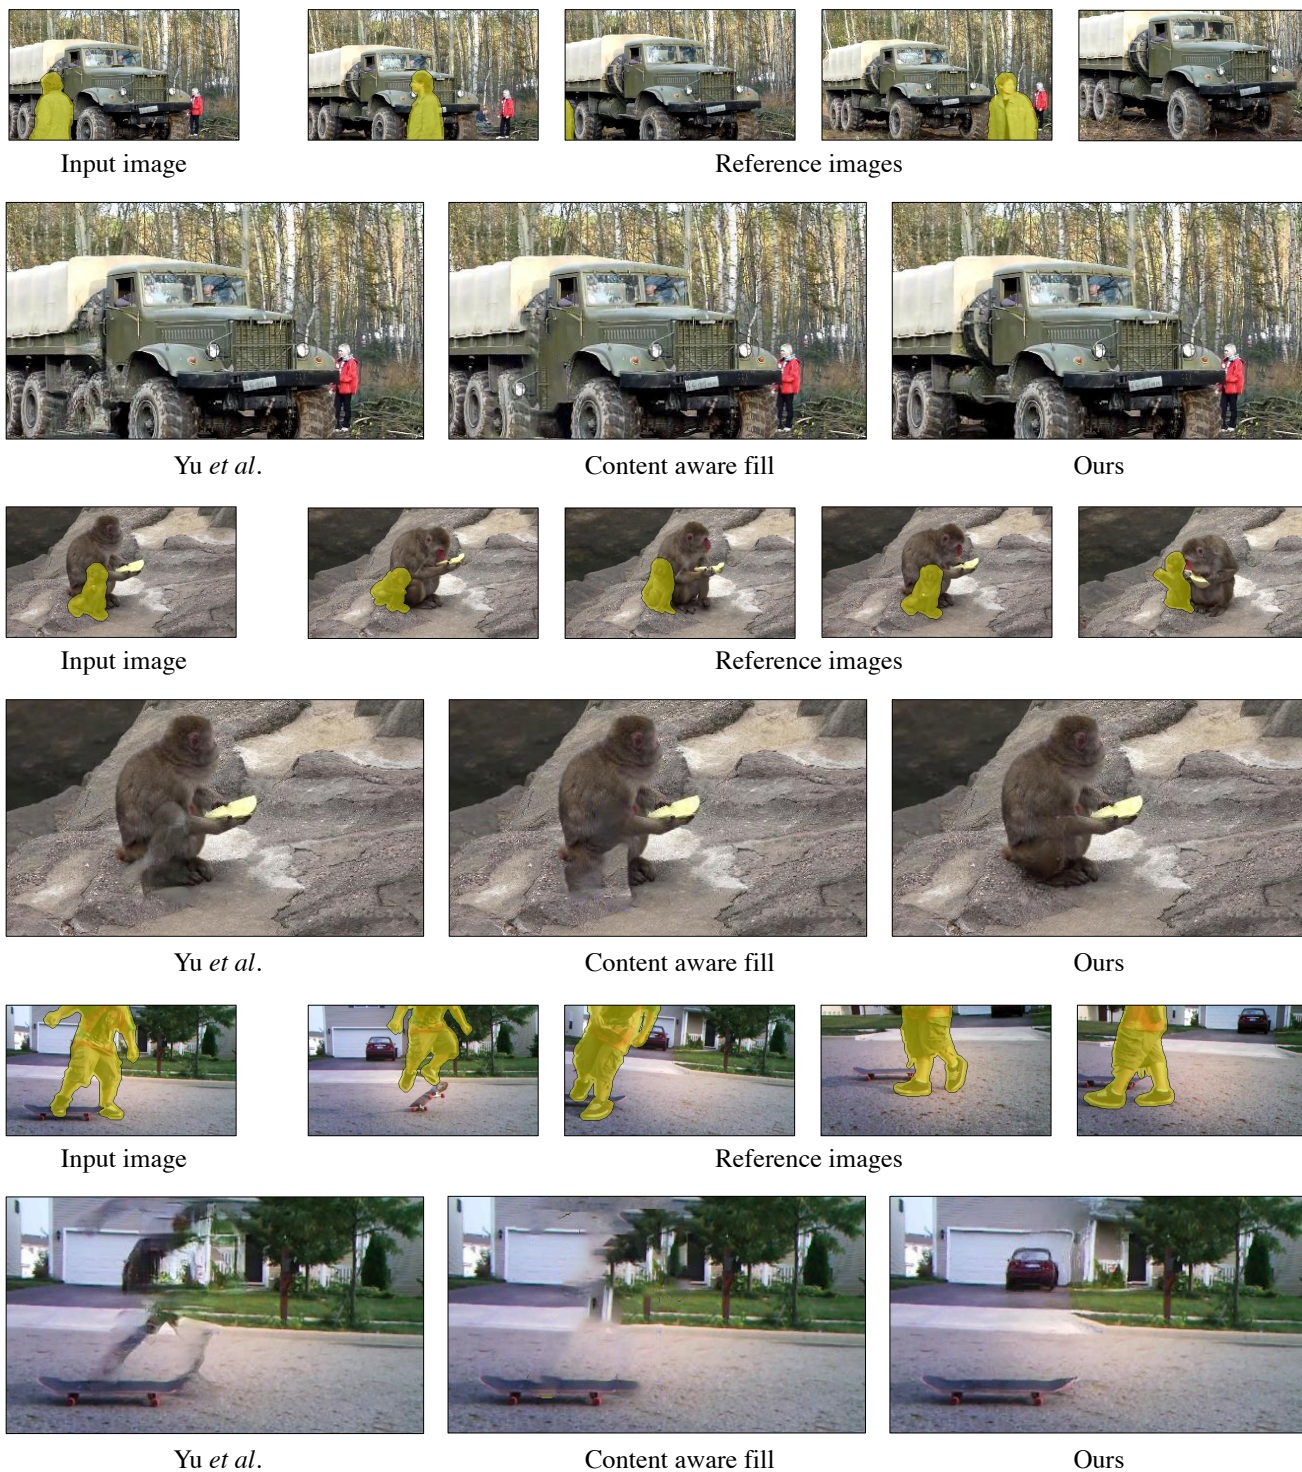

Figure 4: Examples of image completion using a group of photos (Best viewed on a high-resolution display with zoom-in). The images are from Youtube-VOS [9].



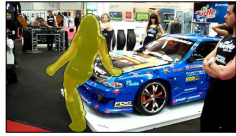

Input image

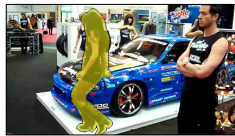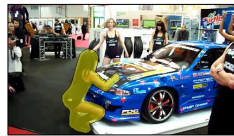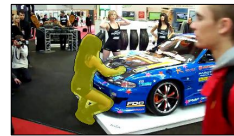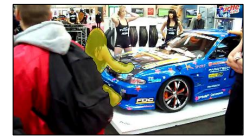

Reference images

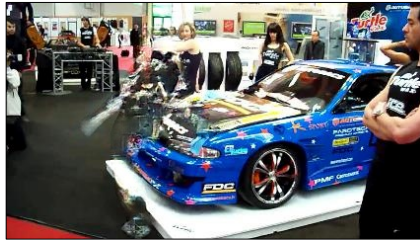

Yu *et al.*

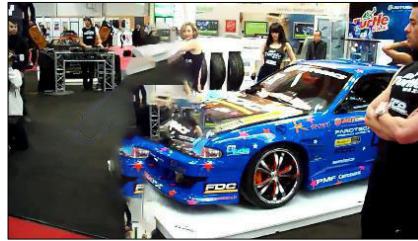

Content aware fill

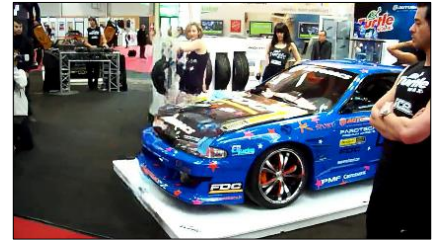

Ours

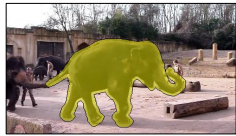

Input image

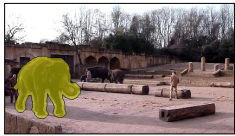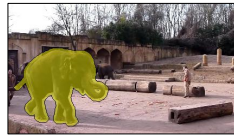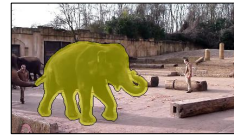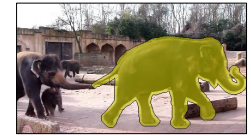

Reference images

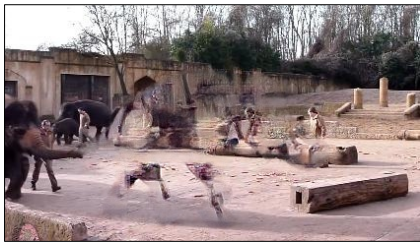

Yu *et al.*

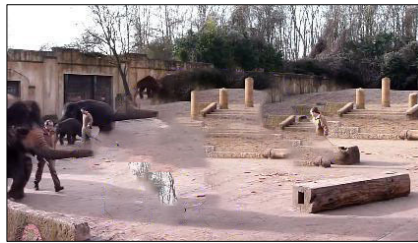

Content aware fill

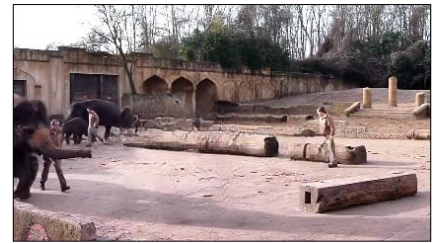

Ours

Figure 5: Examples of image completion using a group of photos (Best viewed on a high-resolution display with zoom-in). The images are from Youtube-VOS [9].
